# Supplementary material for: Physicochemical Characterizations and Pharmacokinetic Evaluation of Pentazocine Solid Lipid Nanoparticles against Inflammatory Pain Model
Source: MDPI journal article supplement (doi:10.3390/pharmaceutics14020409), 2022-02-14
Supplement: s1 [file s1]

# Supplementary Materials: Physicochemical Characterizations and Pharmacokinetic Evaluation of Pentazocine Solid Lipid Nanoparticles Against Inflammatory Pain Model

Zaheer Ullah Khan , Anam Razzaq , Ahsan Khan , Naeem Ur Rehman , Hira Khan , Taous Khan , Ashraf Ullah Khan , Farid Menaa Haroon Iqbal and Naveed Ullah Khan

**Table S1.** Independent variables predicted by DoE.

| Dependent Process Variables   | Particle size (nm)                     |                     |
|-------------------------------|----------------------------------------|---------------------|
|                               | Potential (mV)                         |                     |
|                               | PDI                                    |                     |
|                               | Percentage Entrapment efficiency (EE%) |                     |
| Independent process variables | Percentage loading efficiency (LE%)    |                     |
|                               | Levels                                 |                     |
|                               | Minimum                                | Maximum             |
|                               | -1                                     | +1                  |
| Lipid                         | Stearic acid (S.A)                     | Cetyl alcohol (C.A) |
| Surfactant                    | Tween 80                               | Tween 20            |
| Surfactant concentration (%)  | 2                                      | 3                   |
| Soya lecithin: lipid          | 2:7                                    | 1:8                 |
| Acetone: DCM                  | 1:1                                    | 1:2                 |
| Homogenizer speed (rpm)       | 15000                                  | 16000               |
| Homogenization time (min)     | 10                                     | 15                  |

**Table S2.** PTZ drug release models at pH 1.2 and 6.8.

| Formulation | pH  | R <sup>2</sup> |                        |                 | Values of “n” for Korsmeyer-Peppas |
|-------------|-----|----------------|------------------------|-----------------|------------------------------------|
|             |     | Zero-order     | 1 <sup>st</sup> -order | Higuchi - model |                                    |
| PTZ-Sol     | 1.2 | 0.8781         | 0.8894                 | 0.9424          | 0.527                              |
|             | 6.8 | 0.9851         | 0.9956                 | 0.9893          | 0.650                              |
| PTZ-SLNs    | 1.2 | 0.8668         | 0.8790                 | 0.9548          | 0.494                              |
|             | 6.8 | 0.9440         | 0.9673                 | 0.9799          | 0.655                              |

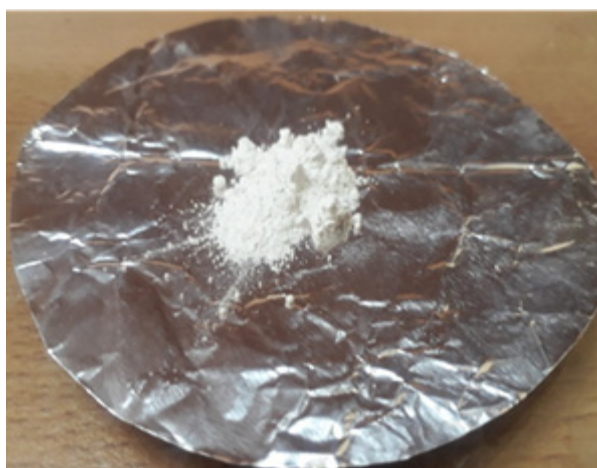

**Figure S1.** Fine powder of lyophilized SLN2.

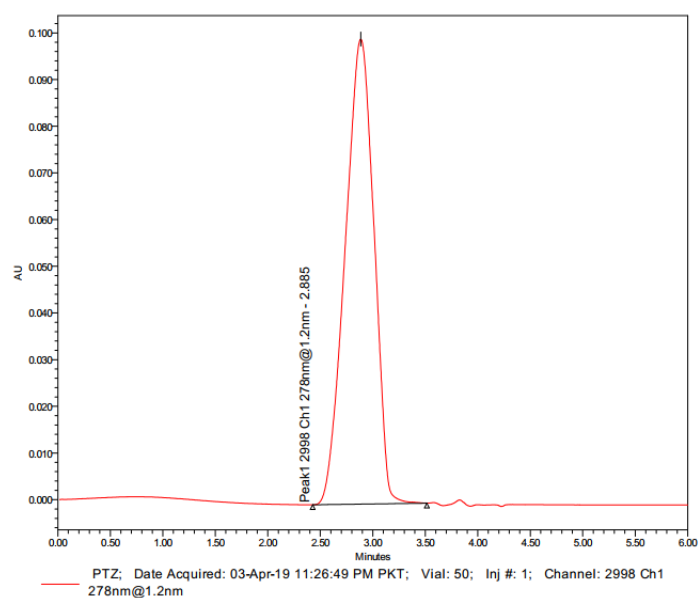

**Figure S2.** Chromatographic profile of free PTZ.

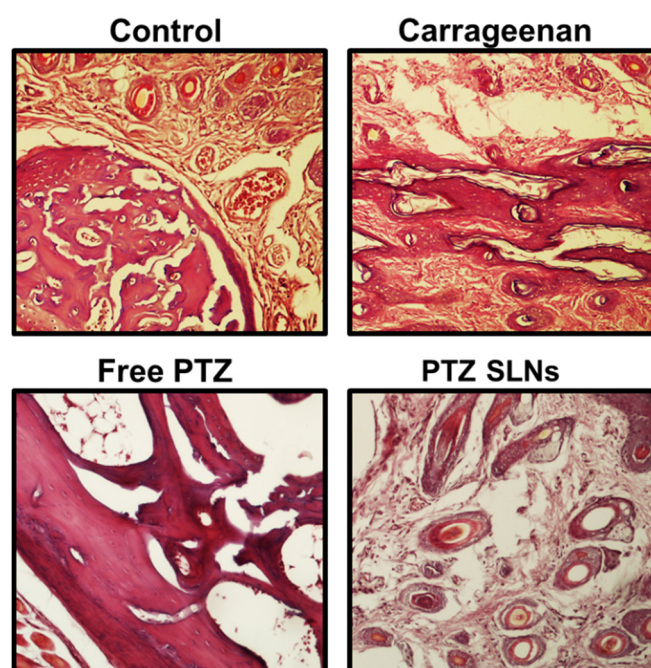

**Figure S3.** Effects of the PTZ-loaded SLN2 on the paw tissue architecture following carrageenan-induced inflammatory pain in Wistar rats.

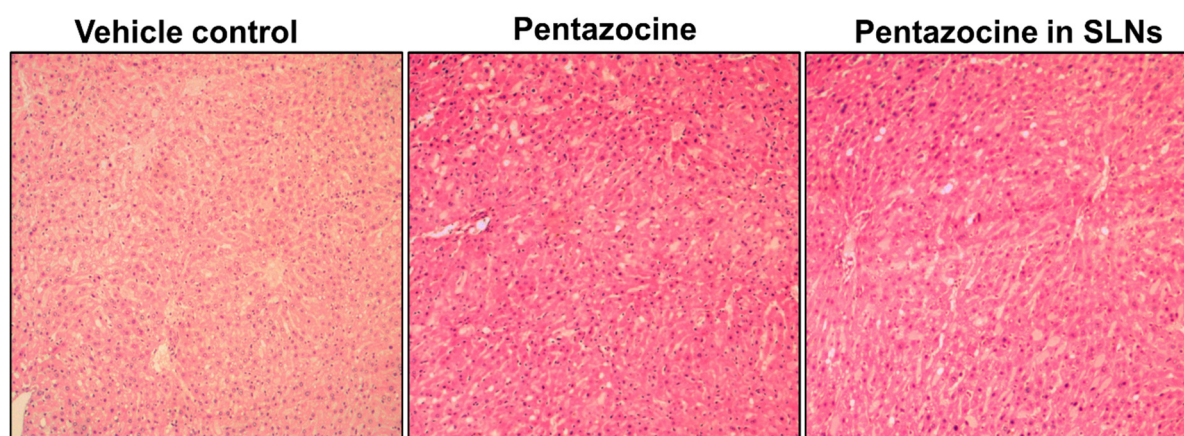

**Figure S4.** Histological effects of PTZ-loaded SLN2 on the liver of Wistar rats.
